# Supplementary material for: Zn(ii) coordination polymer of an in situ generated 4-pyridyl (4Py) attached bis(amido)phosphate ligand, [PO2(NH4Py)2]− showing preferential water uptake over aliphatic alcohols
Source: Royal Society of Chemistry journal article supplement (doi:10.1039/c3dt51123e), 2013-01-01
Supplement: c3dt51123e.pdf [file c3dt51123e.pdf]

**Zn(II) coordination polymer of an in-situ generated 4-pyridyl (<sup>4</sup>Py)  
attached bis(amido)phosphate ligand, [PO<sub>2</sub>(NH<sup>4</sup>Py)<sub>2</sub>]<sup>-</sup> showing  
preferential water uptake over aliphatic alcohols**

Arvind K. Gupta, Sanjog S. Nagarkar and Ramamoorthy Boomishankar\*

*Department of Chemistry, Mendeleev Block, Indian Institute of Science Education and*

*Research, Dr.Homi Bhabha Road, Pune - 411008, India. Fax: +912025908186; E-*

*mail: boomi@iiserpune.ac.in*

**Supporting Information**

**Table S1:** Crystallographic Data

| Compound                               | 1                                                                  | 2                                                               | 3                                                                 | 4                                                                 | 3a (data squeezed)                                                 |
|----------------------------------------|--------------------------------------------------------------------|-----------------------------------------------------------------|-------------------------------------------------------------------|-------------------------------------------------------------------|--------------------------------------------------------------------|
| Chemical formula                       | C <sub>20</sub> H <sub>20</sub> N <sub>8</sub> PCl                 | C <sub>16</sub> H <sub>21</sub> N <sub>6</sub> O <sub>3</sub> P | C <sub>14</sub> H <sub>20</sub> N <sub>5</sub> O <sub>6</sub> PZn | C <sub>14</sub> H <sub>20</sub> N <sub>5</sub> O <sub>6</sub> PZn | C <sub>12</sub> H <sub>17</sub> N <sub>4</sub> O <sub>6</sub> P Zn |
| Formula weight                         | 438.86                                                             | 376.36                                                          | 450.69                                                            | 450.69                                                            | 409.64                                                             |
| Temperature                            | 150(2)K                                                            | 296(2)K                                                         | 100(2)K                                                           | 100(2)K                                                           | 100(2)K                                                            |
| Crystal system                         | cubic                                                              | Monoclinic                                                      | Orthorhombic                                                      | Monoclinic                                                        | Orthorhombic                                                       |
| Space group                            | I -43d                                                             | Pc                                                              | Pbca                                                              | P2(1)/n                                                           | Pbca                                                               |
| a (Å); α (°)                           | 18.926(5); 90                                                      | 10.922(6); 90                                                   | 14.073(2); 90                                                     | 11.522(15); 90                                                    | 14.135(2); 90                                                      |
| b (Å); β (°)                           | 18.926(5); 90                                                      | 9.348(5); 110.05(3)                                             | 15.623(3); 90                                                     | 13.900(19); 103.70(3)                                             | 15.420(3); 90                                                      |
| c (Å); γ (°)                           | 18.926(5); 90                                                      | 9.763(5); 90                                                    | 18.459(3); 90                                                     | 11.714(16); 90                                                    | 18.524(3); 90                                                      |
| V (Å <sup>3</sup> ); Z                 | 6779(3); 12                                                        | 936.42(9); 2                                                    | 4058.3(12); 8                                                     | 1822.7(4); 4                                                      | 4037.5(12); 8                                                      |
| ρ (calc.) mg m <sup>-3</sup>           | 1.290                                                              | 1.335                                                           | 1.475                                                             | 1.642                                                             | 1.348                                                              |
| μ(Mo K <sub>α</sub> ) mm <sup>-1</sup> | 0.263                                                              | 0.176                                                           | 1.328                                                             | 1.478                                                             | 1.326                                                              |
| 2θ <sub>max</sub> (°)                  | 56                                                                 | 56                                                              | 50                                                                | 56                                                                | 56                                                                 |
| R(int)                                 | 0.0417                                                             | 0.0742                                                          | 0.186                                                             | 0.0544                                                            | 0.0779                                                             |
| Completeness to θ                      | 99.5 %                                                             | 98.1 %                                                          | 99.8%                                                             | 99.2%                                                             | 99.5%                                                              |
| Data / param.                          | 1398 / 75                                                          | 4083 / 243                                                      | 3576 / 253                                                        | 4492 / 244                                                        | 4988/190                                                           |
| GOF                                    | 1.190                                                              | 1.070                                                           | 1.001                                                             | 1.031                                                             | 1.036                                                              |
| R1 [F>4σ(F)]                           | 0.0707                                                             | 0.0476                                                          | 0.0499                                                            | 0.0470                                                            | 0.0455                                                             |
| wR2 (all data)                         | 0.2389                                                             | 0.1389                                                          | 0.1302                                                            | 0.1194                                                            | 0.1169                                                             |
| max. peak/hole (e.Å <sup>-3</sup> )    | 1.064/ -0.329                                                      | 0.438/ -0.448                                                   | 0.973 / -0.445                                                    | 1.471 / -1.089                                                    | 1.026/-0.467                                                       |
| <b>Compound</b>                        | <b>3a</b>                                                          |                                                                 |                                                                   |                                                                   |                                                                    |
| Chemical formula                       | C <sub>12</sub> H <sub>17</sub> N <sub>4</sub> O <sub>6</sub> P Zn |                                                                 |                                                                   |                                                                   |                                                                    |
| Formula weight                         | 409.64                                                             |                                                                 |                                                                   |                                                                   |                                                                    |
| Temperature                            | 100(2)K                                                            |                                                                 |                                                                   |                                                                   |                                                                    |
| Crystal system                         | Orthorhombic                                                       |                                                                 |                                                                   |                                                                   |                                                                    |
| Space group                            | Pbca                                                               |                                                                 |                                                                   |                                                                   |                                                                    |
| a (Å); α (°)                           | 14.135(2); 90                                                      |                                                                 |                                                                   |                                                                   |                                                                    |
| b (Å); β (°)                           | 15.420(3); 90                                                      |                                                                 |                                                                   |                                                                   |                                                                    |
| c (Å); γ (°)                           | 18.524(3); 90                                                      |                                                                 |                                                                   |                                                                   |                                                                    |
| V (Å <sup>3</sup> ); Z                 | 4037.5(12); 8                                                      |                                                                 |                                                                   |                                                                   |                                                                    |
| ρ (calc.) mg m <sup>-3</sup>           | 1.348                                                              |                                                                 |                                                                   |                                                                   |                                                                    |
| μ(Mo K <sub>α</sub> ) mm <sup>-1</sup> | 1.326                                                              |                                                                 |                                                                   |                                                                   |                                                                    |
| 2θ <sub>max</sub> (°)                  | 56                                                                 |                                                                 |                                                                   |                                                                   |                                                                    |
| R(int)                                 | 0.0831                                                             |                                                                 |                                                                   |                                                                   |                                                                    |
| Completeness to θ                      | 99.5%                                                              |                                                                 |                                                                   |                                                                   |                                                                    |
| Data / param.                          | 4988 / 215                                                         |                                                                 |                                                                   |                                                                   |                                                                    |
| GOF                                    | 1.102                                                              |                                                                 |                                                                   |                                                                   |                                                                    |
| R1 [F>4σ(F)]                           | 0.0598                                                             |                                                                 |                                                                   |                                                                   |                                                                    |
| wR2 (all data)                         | 0.1700                                                             |                                                                 |                                                                   |                                                                   |                                                                    |
| max. peak/hole (e.Å <sup>-3</sup> )    | 1.335 / -0.511                                                     |                                                                 |                                                                   |                                                                   |                                                                    |

**Table S2:** Selected bond-lengths and angles for **1**, **2**, **3**, **4** and **3a**

| Compound  | Bond lengths                                                                                                                                                                                                           | Bond Angles                                                                                                                                                                                                                                                                                                                                                                                                                                                                                                                                            |
|-----------|------------------------------------------------------------------------------------------------------------------------------------------------------------------------------------------------------------------------|--------------------------------------------------------------------------------------------------------------------------------------------------------------------------------------------------------------------------------------------------------------------------------------------------------------------------------------------------------------------------------------------------------------------------------------------------------------------------------------------------------------------------------------------------------|
| <b>1</b>  | P(1)-N(1)#1: 1.631(3)<br>P(1)-N(1)#2: 1.631(3)<br>P(1)-N(1)#3: 1.631(3)<br>P(1)-N(1): 1.631(3)                                                                                                                         | N(1)#1-P(1)-N(1)#2: 107.02(8)<br>N(1)#1-P(1)-N(1)#3: 107.02(8)<br>N(1)#2-P(1)-N(1)#3: 114.49(16)<br>N(1)#1-P(1)-N(1): 114.49(16)<br>N(1)#2-P(1)-N(1): 107.02(8)<br>N(1)#3-P(1)-N(1): 107.02(8)                                                                                                                                                                                                                                                                                                                                                         |
| <b>2</b>  | P(1)-O(1): 1.4781(17)<br>P(1)-N(3): 1.638(2)<br>P(1)-N(2): 1.649(2)<br>P(1)-N(1): 1.660(2)                                                                                                                             | O(1)-P(1)-N(3): 115.66(11)<br>O(1)-P(1)-N(2): 114.60(11)<br>N(3)-P(1)-N(2): 102.51(10)<br>O(1)-P(1)-N(1): 112.73(10)<br>N(3)-P(1)-N(1): 105.17(11)<br>N(2)-P(1)-N(1): 104.95(11)                                                                                                                                                                                                                                                                                                                                                                       |
| <b>3</b>  | Zn(1)-O(2): 1.927(3)<br>Zn(1)-O(3): 1.945(4)<br>Zn(1)-N(14)#1: 1.993(4)<br>Zn(1)-N(24)#2: 2.007(4)<br>P(1)-O(1): 1.481(4)<br>P(1)-O(2): 1.503(3)<br>P(1)-N(1): 1.665(4)<br>P(1)-N(2): 1.670(4)                         | O(2)-Zn(1)-O(3): 121.88(16)<br>O(2)-Zn(1)-N(14)#1: 109.80(16)<br>O(3)-Zn(1)-N(14)#1: 108.15(18)<br>O(2)-Zn(1)-N(24)#2: 101.00(15)<br>O(3)-Zn(1)-N(24)#2: 102.52(17)<br>N(14)#1-Zn(1)-N(24)#2: 113.17(17)<br>O(1)-P(1)-O(2): 119.2(2)<br>O(1)-P(1)-N(1): 105.7(2)<br>O(2)-P(1)-N(1): 108.1(2)<br>O(1)-P(1)-N(2): 111.5(2)<br>O(2)-P(1)-N(2): 104.6(2)<br>N(1)-P(1)-N(2): 107.1(2)<br>P(1)-O(2)-Zn(1): 139.0(2)                                                                                                                                          |
| <b>4</b>  | Zn(1)-O(4): 2.044(2)<br>Zn(1)-N(14)#1: 2.045(3)<br>Zn(1)-N(24)#2: 2.067(3)<br>Zn(1)-O(2): 2.095(2)<br>Zn(1)-O(3): 2.167(3)<br>P(1)-O(1): 1.488(2)<br>P(1)-O(2): 1.498(2)<br>P(1)-N(1): 1.680(3)<br>P(1)-N(2): 1.682(3) | O(4)-Zn(1)-N(14)#1: 138.19(11)<br>O(4)-Zn(1)-N(24)#2: 112.00(11)<br>N(14)#1-Zn(1)-N(24)#2: 109.55(11)<br>O(4)-Zn(1)-O(2): 90.33(10)<br>N(14)#1-Zn(1)-O(2): 93.50(11)<br>N(24)#2-Zn(1)-O(2): 90.93(10)<br>O(4)-Zn(1)-O(3): 80.96(10)<br>N(14)#1-Zn(1)-O(3): 90.29(11)<br>N(24)#2-Zn(1)-O(3): 96.18(10)<br>O(2)-Zn(1)-O(3): 170.34(9)<br>O(1)-P(1)-O(2): 119.75(14)<br>O(1)-P(1)-N(1): 105.16(15)<br>O(2)-P(1)-N(1): 109.83(14)<br>O(1)-P(1)-N(2): 110.13(14)<br>O(2)-P(1)-N(2): 104.43(14)<br>N(1)-P(1)-N(2): 106.99(15)<br>P(1)-O(2)-Zn(1): 145.31(14) |
| <b>3a</b> | Zn(1)-O(1): 1.934(2)<br>Zn(1)-O(3): 1.954(2)<br>Zn(1)-N(14)#1: 1.994(2)<br>Zn(1)-N(24)#2: 2.013(2)<br>P(1)-O(2): 1.484(2)<br>P(1)-O(1): 1.505(2)<br>P(1)-N(1): 1.668(2)<br>P(1)-N(2): 1.676(2)                         | O(1)-Zn(1)-O(3): 122.74(10)<br>O(1)-Zn(1)-N(14)#1: 108.16(10)<br>O(3)-Zn(1)-N(14)#1: 107.40(10)<br>O(1)-Zn(1)-N(24)#2: 100.51(9)<br>O(3)-Zn(1)-N(24)#2: 102.95(10)<br>N(14)#1-Zn(1)-N(24)#2: 115.30(10)<br>O(2)-P(1)-O(1): 119.61(12)<br>O(2)-P(1)-N(1): 105.66(12)<br>O(1)-P(1)-N(1): 108.14(12)<br>O(2)-P(1)-N(2): 111.49(12)<br>O(1)-P(1)-N(2): 104.07(12)<br>N(1)-P(1)-N(2): 107.33(13)<br>P(1)-O(1)-Zn(1): 140.05(13)                                                                                                                             |

**Table S3:** Table of hydrogen bonding parameters for **1**, **2**, **3**, **4** and **3a**

| Compound                                                                                                                                                          | D-H...A                                                                                                                                                                                                        | d(H...A) Å | d(D...A) Å | <(DHA)° |
|-------------------------------------------------------------------------------------------------------------------------------------------------------------------|----------------------------------------------------------------------------------------------------------------------------------------------------------------------------------------------------------------|------------|------------|---------|
| <b>1</b>                                                                                                                                                          | N(1)-H(1)...Cl(1)#4                                                                                                                                                                                            | 1.96       | 2.801(4)   | 160.8   |
|                                                                                                                                                                   | Symmetry transformations used to generate equivalent atoms:<br>#1 -x+2,-y+3/2,z #2 -y+7/4,x-1/4,-z+1/4 #3 y+1/4,-x+7/4,-z+1/4<br>#4 -y+5/4,-x+7/4,z-1/4                                                        |            |            |         |
| <b>2</b>                                                                                                                                                          | N(1)-H(1)...O(1)#1                                                                                                                                                                                             | 2.11       | 2.872(3)   | 146.9   |
|                                                                                                                                                                   | N(2)-H(2)...O(1S)#2                                                                                                                                                                                            | 2.02       | 2.852(3)   | 163.7   |
|                                                                                                                                                                   | N(3)-H(3)...N(21)#3                                                                                                                                                                                            | 2.12       | 2.897(3)   | 150.9   |
|                                                                                                                                                                   | O(1S)-H(1S)...O(2M)#4                                                                                                                                                                                          | 2.32(6)    | 2.902(6)   | 130(5)  |
|                                                                                                                                                                   | O(1S)-H(2S)...N(31)#5                                                                                                                                                                                          | 2.36(5)    | 2.877(4)   | 123(5)  |
|                                                                                                                                                                   | O(2M)-H(2M)...N(11)                                                                                                                                                                                            | 1.91       | 2.700(5)   | 161.5   |
| Symmetry transformations used to generate equivalent atoms:<br>#1 x,-y+1,z-1/2 #2 x,-y+1,z+1/2 #3 x,-y+2,z-1/2<br>#4 x,-y,z-1/2 #5 x+1,y,z                        |                                                                                                                                                                                                                |            |            |         |
| <b>3</b>                                                                                                                                                          | N(1)-H(1)...O(1)#5                                                                                                                                                                                             | 1.93       | 2.806(5)   | 170.3   |
|                                                                                                                                                                   | N(2)-H(2)...O(4)                                                                                                                                                                                               | 1.96       | 2.797(6)   | 158.9   |
|                                                                                                                                                                   | O(1W)-H(1W)...O(1)#5                                                                                                                                                                                           | 2.11(3)    | 2.943(6)   | 161(7)  |
|                                                                                                                                                                   | O(1W)-H(2W)...O(1S)                                                                                                                                                                                            | 1.92(4)    | 2.773(9)   | 162(9)  |
| Symmetry transformations used to generate equivalent atoms:<br>#1 -x+1/2,y+1/2,z #2 -x+1/2,-y+2,z-1/2 #3 -x+1/2,y-1/2,z<br>#4 -x+1/2,-y+2,z+1/2 #5 -x+1,-y+2,-z+1 |                                                                                                                                                                                                                |            |            |         |
| <b>4</b>                                                                                                                                                          | O(3)-H(1W)...O(4)#5                                                                                                                                                                                            | 2.01(3)    | 2.775(3)   | 170(4)  |
|                                                                                                                                                                   | O(3)-H(2W)...O(1)#6                                                                                                                                                                                            | 1.89(3)    | 2.666(3)   | 170(4)  |
|                                                                                                                                                                   | N(1)-H(1)...O(6')#7                                                                                                                                                                                            | 2.00       | 2.862(17)  | 166.5   |
|                                                                                                                                                                   | N(1)-H(1)...O(6)#7                                                                                                                                                                                             | 2.13       | 2.955(5)   | 155.6   |
|                                                                                                                                                                   | N(2)-H(2)...O(5)                                                                                                                                                                                               | 1.97       | 2.842(4)   | 169.7   |
|                                                                                                                                                                   | Symmetry transformations used to generate equivalent atoms:<br>#1 x+1/2,-y+3/2,z+1/2 #2 x-1/2,-y+3/2,z+1/2<br>#3 x-1/2,-y+3/2,z-1/2 #4 x+1/2,-y+3/2,z-1/2<br>#5 -x,-y+1,-z+2 #6 -x+1/2,y-1/2,-z+5/2 #7 x,y+1,z |            |            |         |
| <b>3a</b>                                                                                                                                                         | N(1)-H(1)...O(2)#5                                                                                                                                                                                             | 1.95       | 2.828(3)   | 171.9   |
|                                                                                                                                                                   | N(2)-H(2)...O(4)                                                                                                                                                                                               | 1.97       | 2.805(3)   | 158.9   |
| Symmetry transformations used to generate equivalent atoms:<br>#1 -x+3/2,y+1/2,z #2 -x+3/2,-y+2,z-1/2 #3 -x+3/2,y-1/2,z<br>#4 -x+3/2,-y+2,z+1/2 #5 -x+2,-y+2,-z+1 |                                                                                                                                                                                                                |            |            |         |

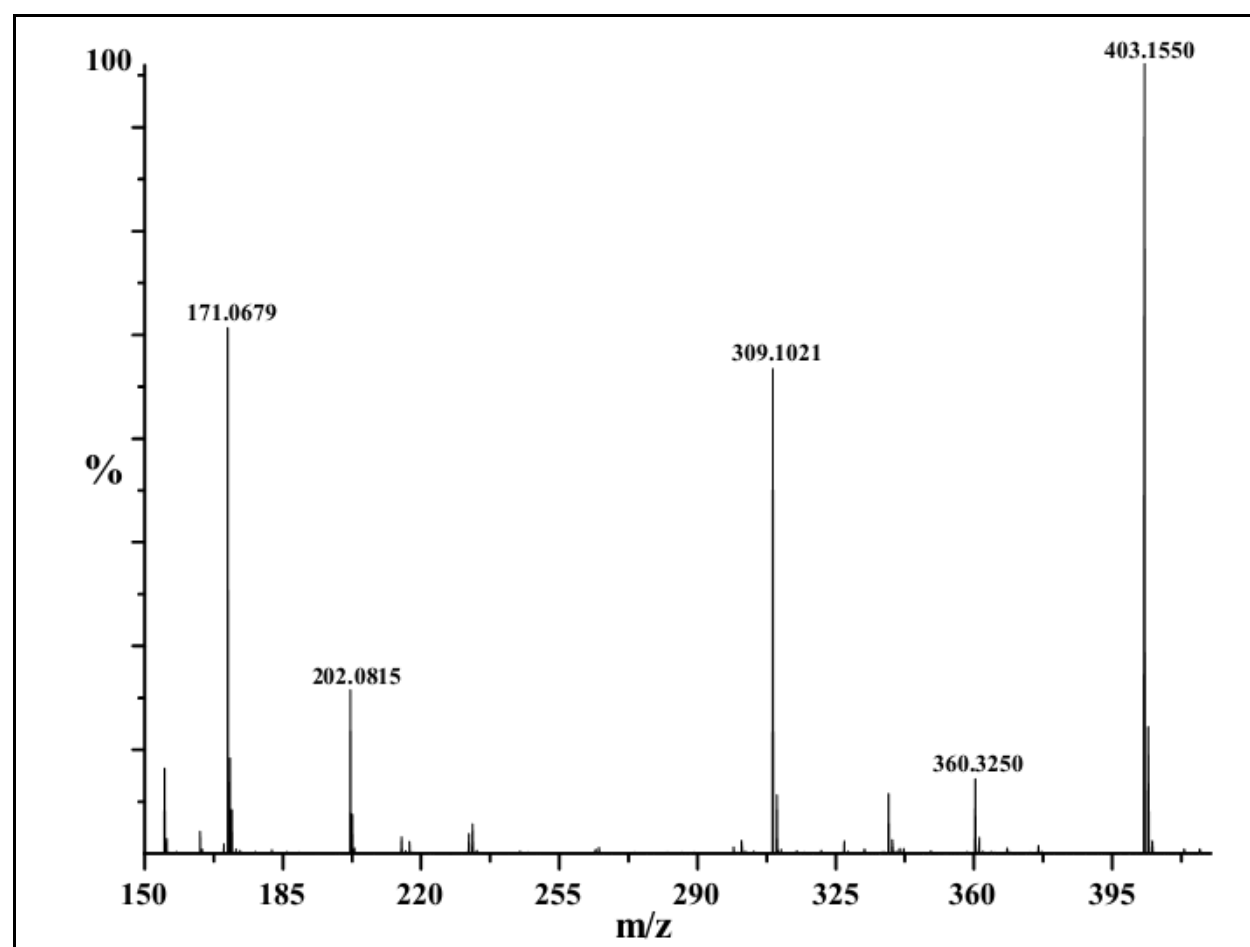

Figure S1: ESI(+) Mass spectra of 1.

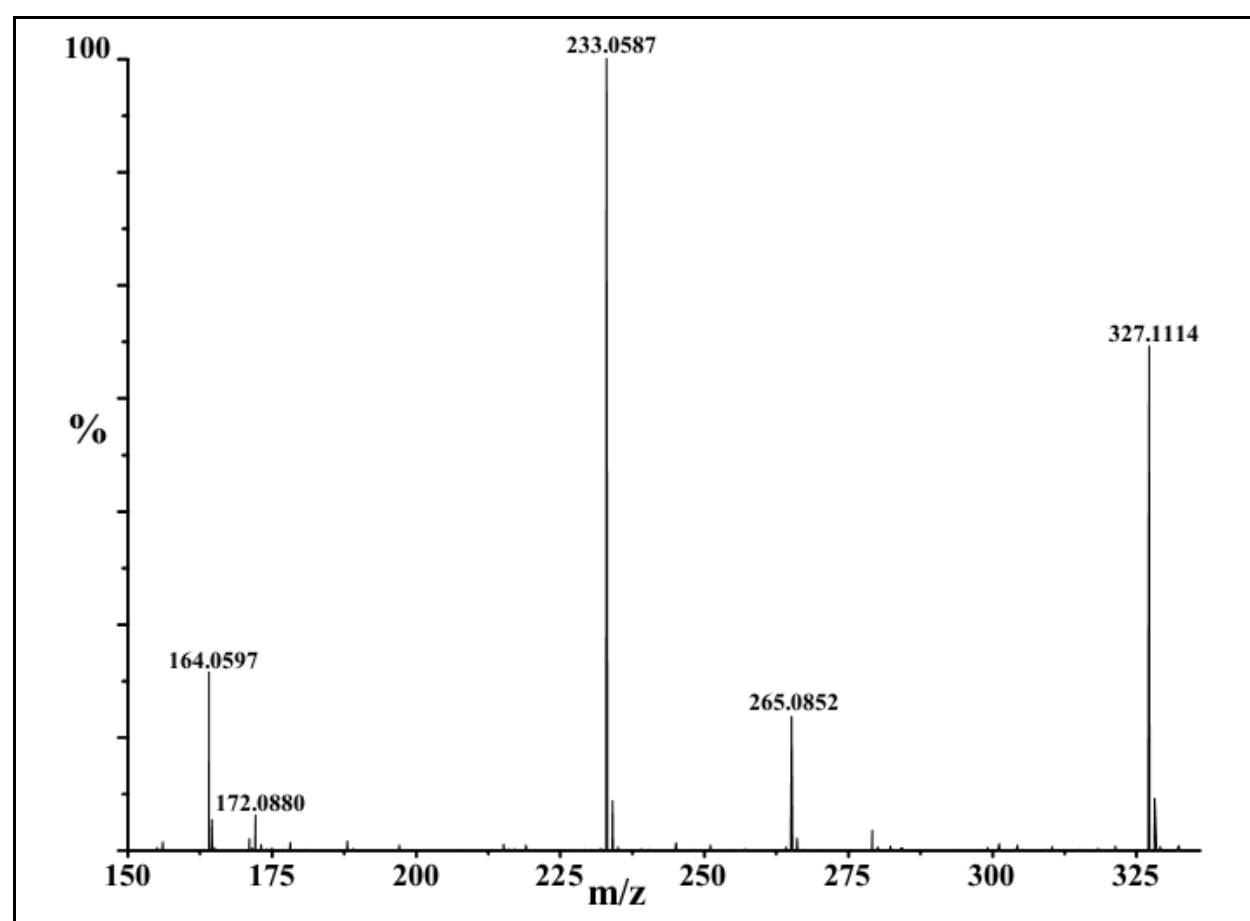

Figure S2: ESI(+) Mass spectra of 2.

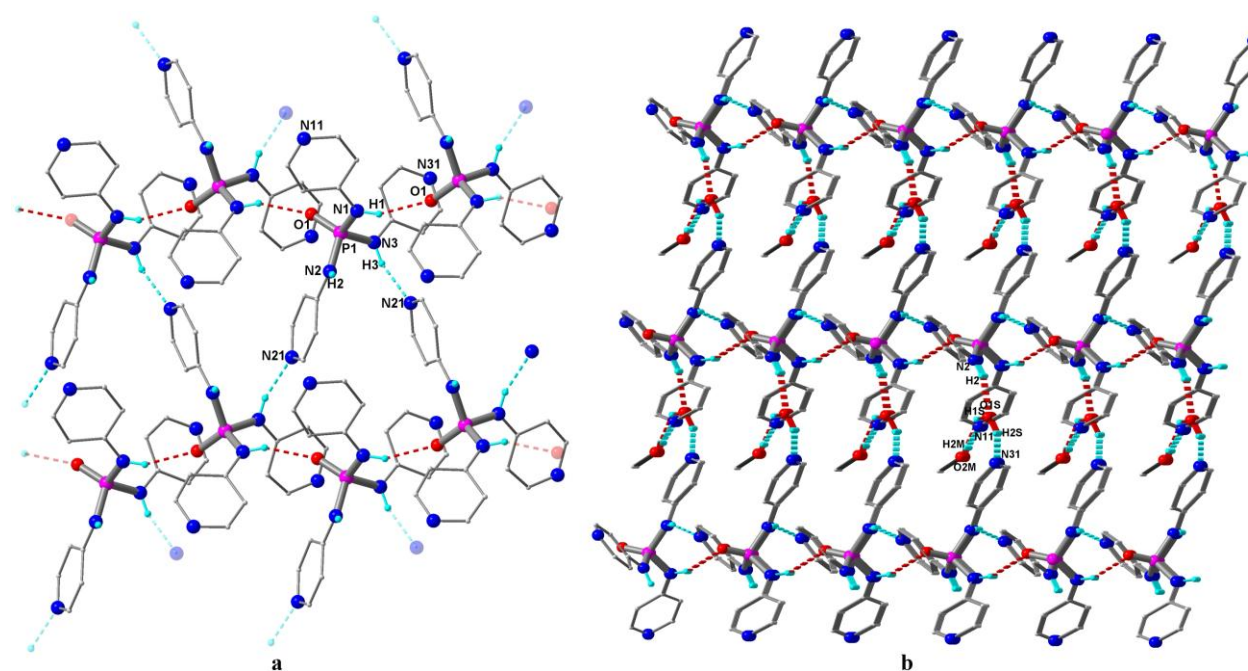

**Figure S3:** (a) View of the H-bonded 2D-sheet in **2** formed by the interaction of amino protons with P=O and pyridyl groups; (b) formation the 3D-network mediated by the solvated water molecules. The layers are slightly offset to show the 3D-nature of the network.

Interaction of one of the amino protons (N1–H1) with the nearby P=O group (O1) initially forms a 1D-chain structure along the c-axis. Interaction of the second amino-proton (N3–H3) with the pyridyl groups (N21) that belongs to N2 connects the adjacent chains resulting in a 2D-sheet structure running along the bc-plane (Figure S3a). Finally, the solvated water molecules act as a linker between the individual 2D-sheets and connects the remaining amino protons (N2–H2...O1S) and one of the pyridyl nitrogens (O1S–H2S...N31) forming the 3D-network. The solvated molecules of methanol are located along the 1D-channel inside the network and involved in H-bonding with water (O1S–H1S...O2M) and the remaining pyridyl moiety (O2M–H2M...N11) (Figure S3b).

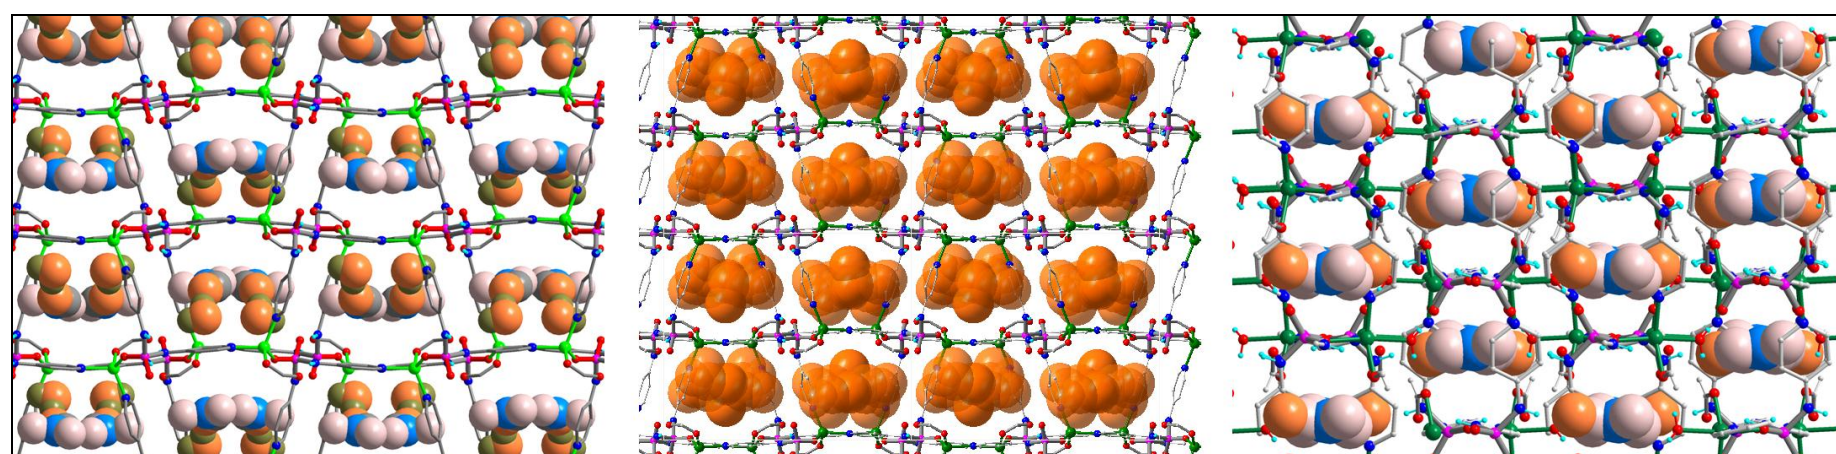

**Figure S4:** Packing diagram of **3** (left), **3a** (middle) and **4** (right) with solvated molecules shown in space fill representation. **3** contains solvated DMF and water, **3a** contains disordered methanol and water and **4** contains disordered DMF. The solvent disorder in **3a** could not be resolved and hence they are refined as partially occupied oxygen atoms. In **4** the whole DMF molecule was disordered over two positions of which only one of them is shown in the packing. Color code for solvent atoms: oxygen: orange; hydrogen: dusty green; nitrogen: light blue; carbon: light pink.

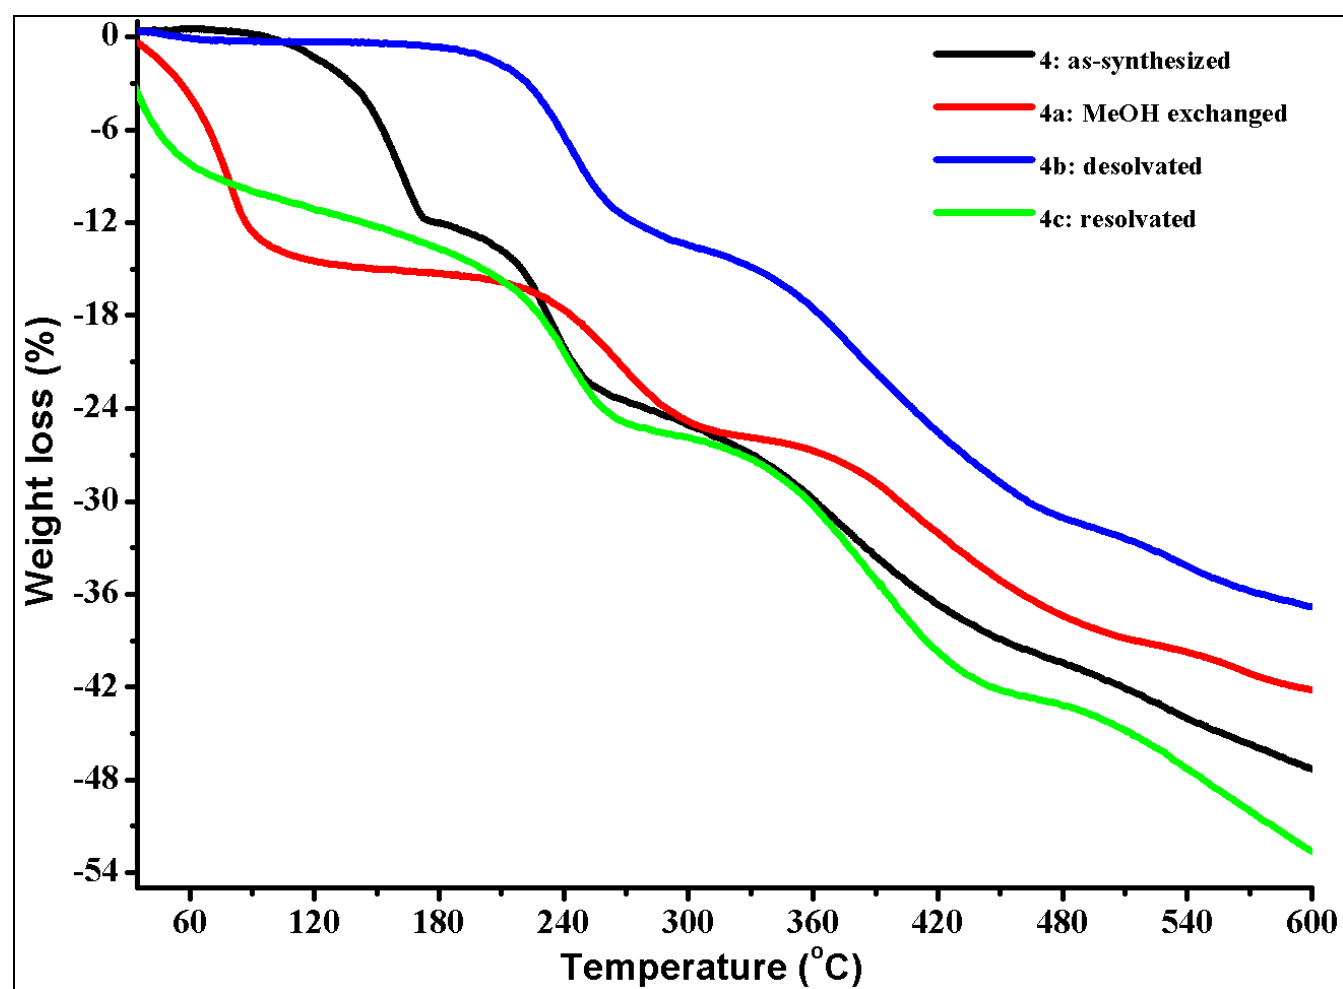

Figure S5: TGA graphs for various samples of 4

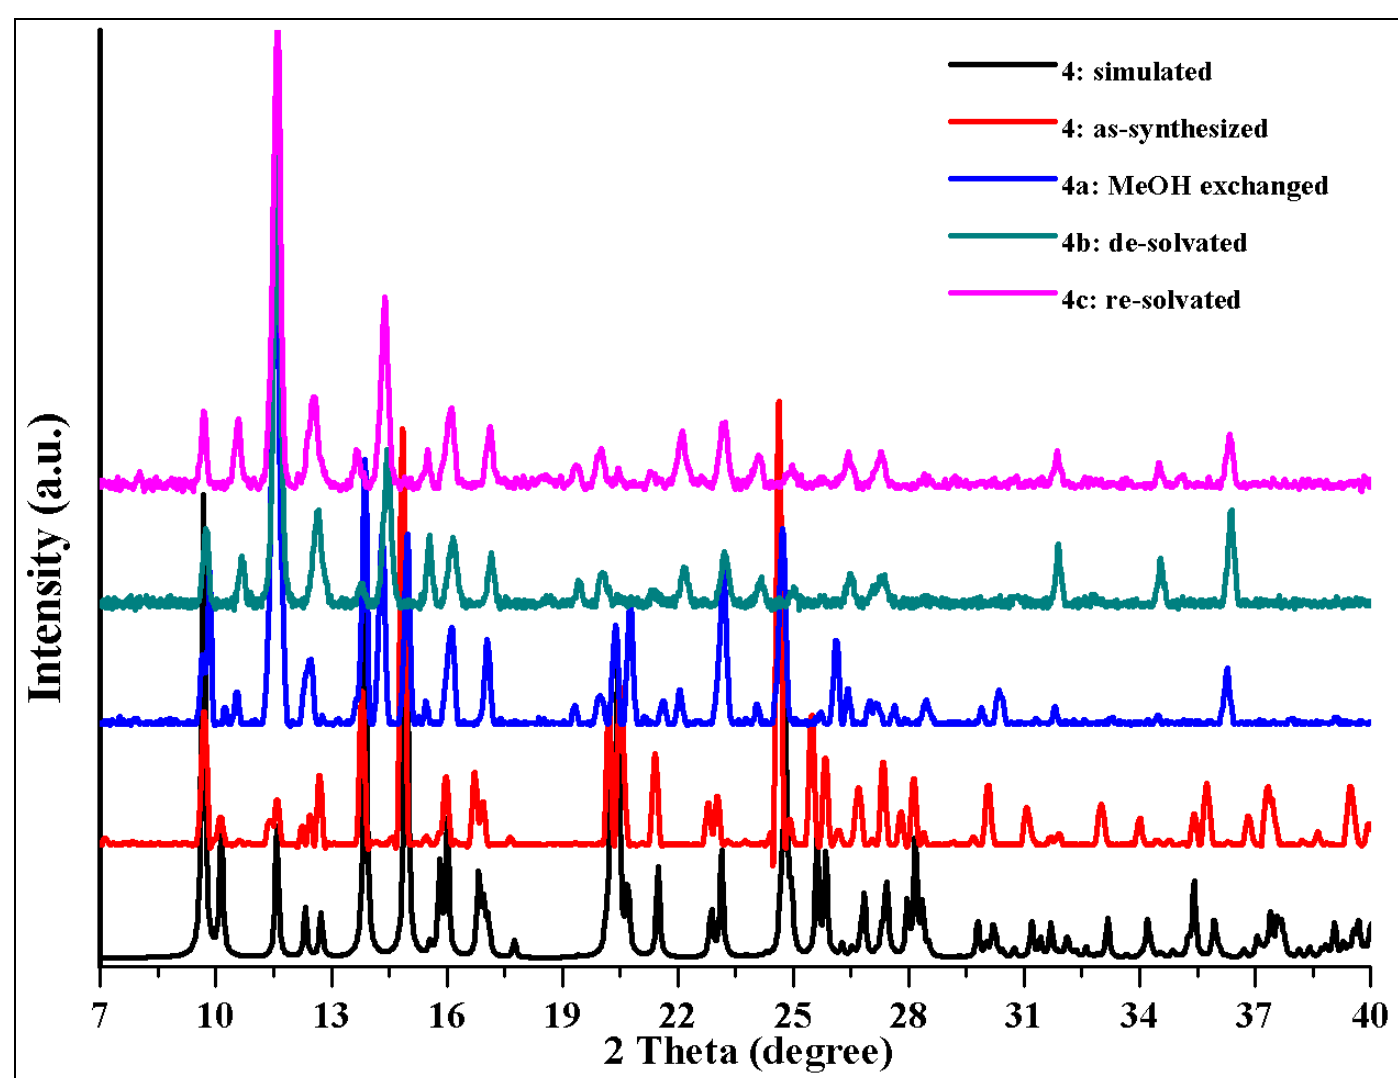

Figure S6: PXRD patterns for various samples of 4

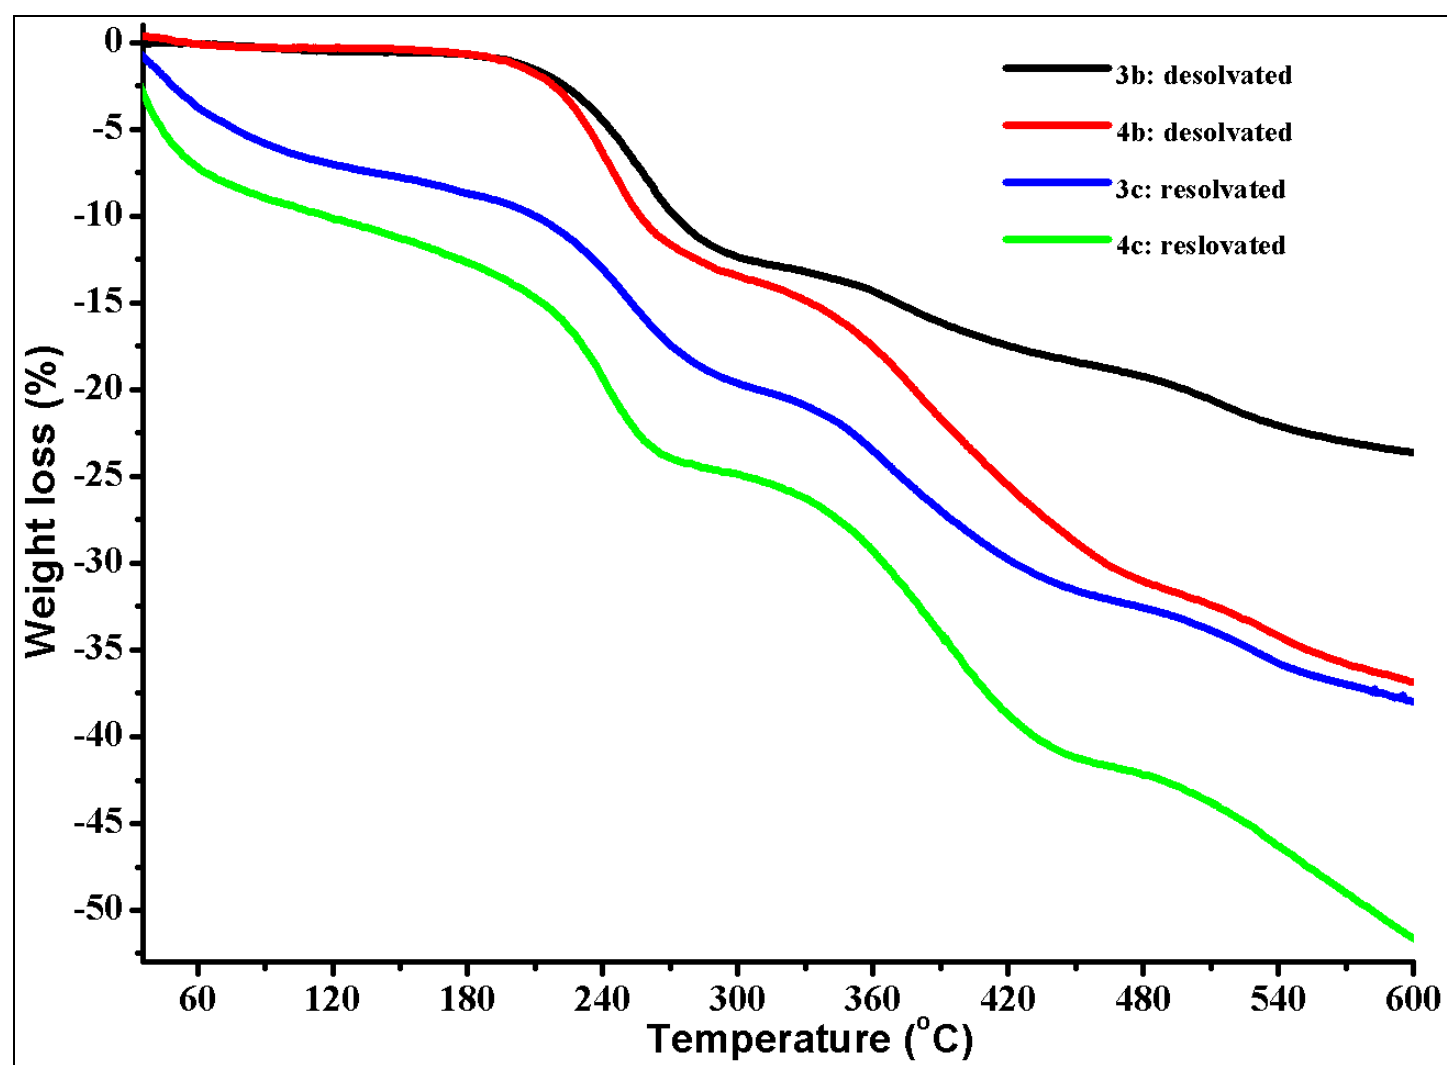

Figure S7: TGA comparison plots for de-solvated and re-solvated samples of 3 and 4

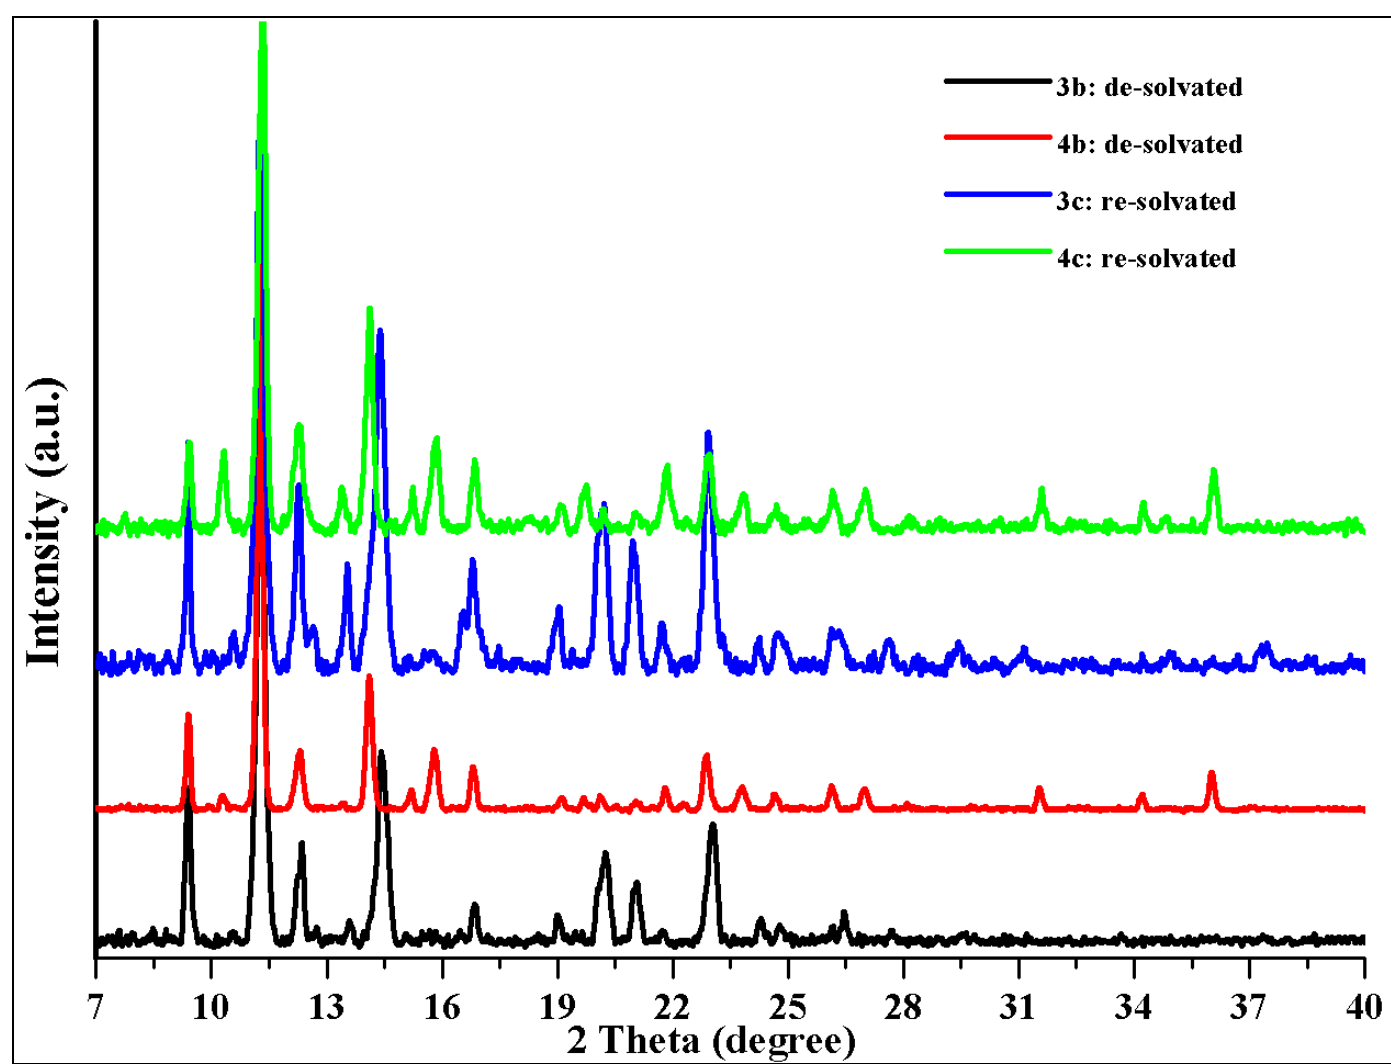

Figure S8: Comparative PXRD patterns for de-solvated and re-solvated samples of 3 and 4



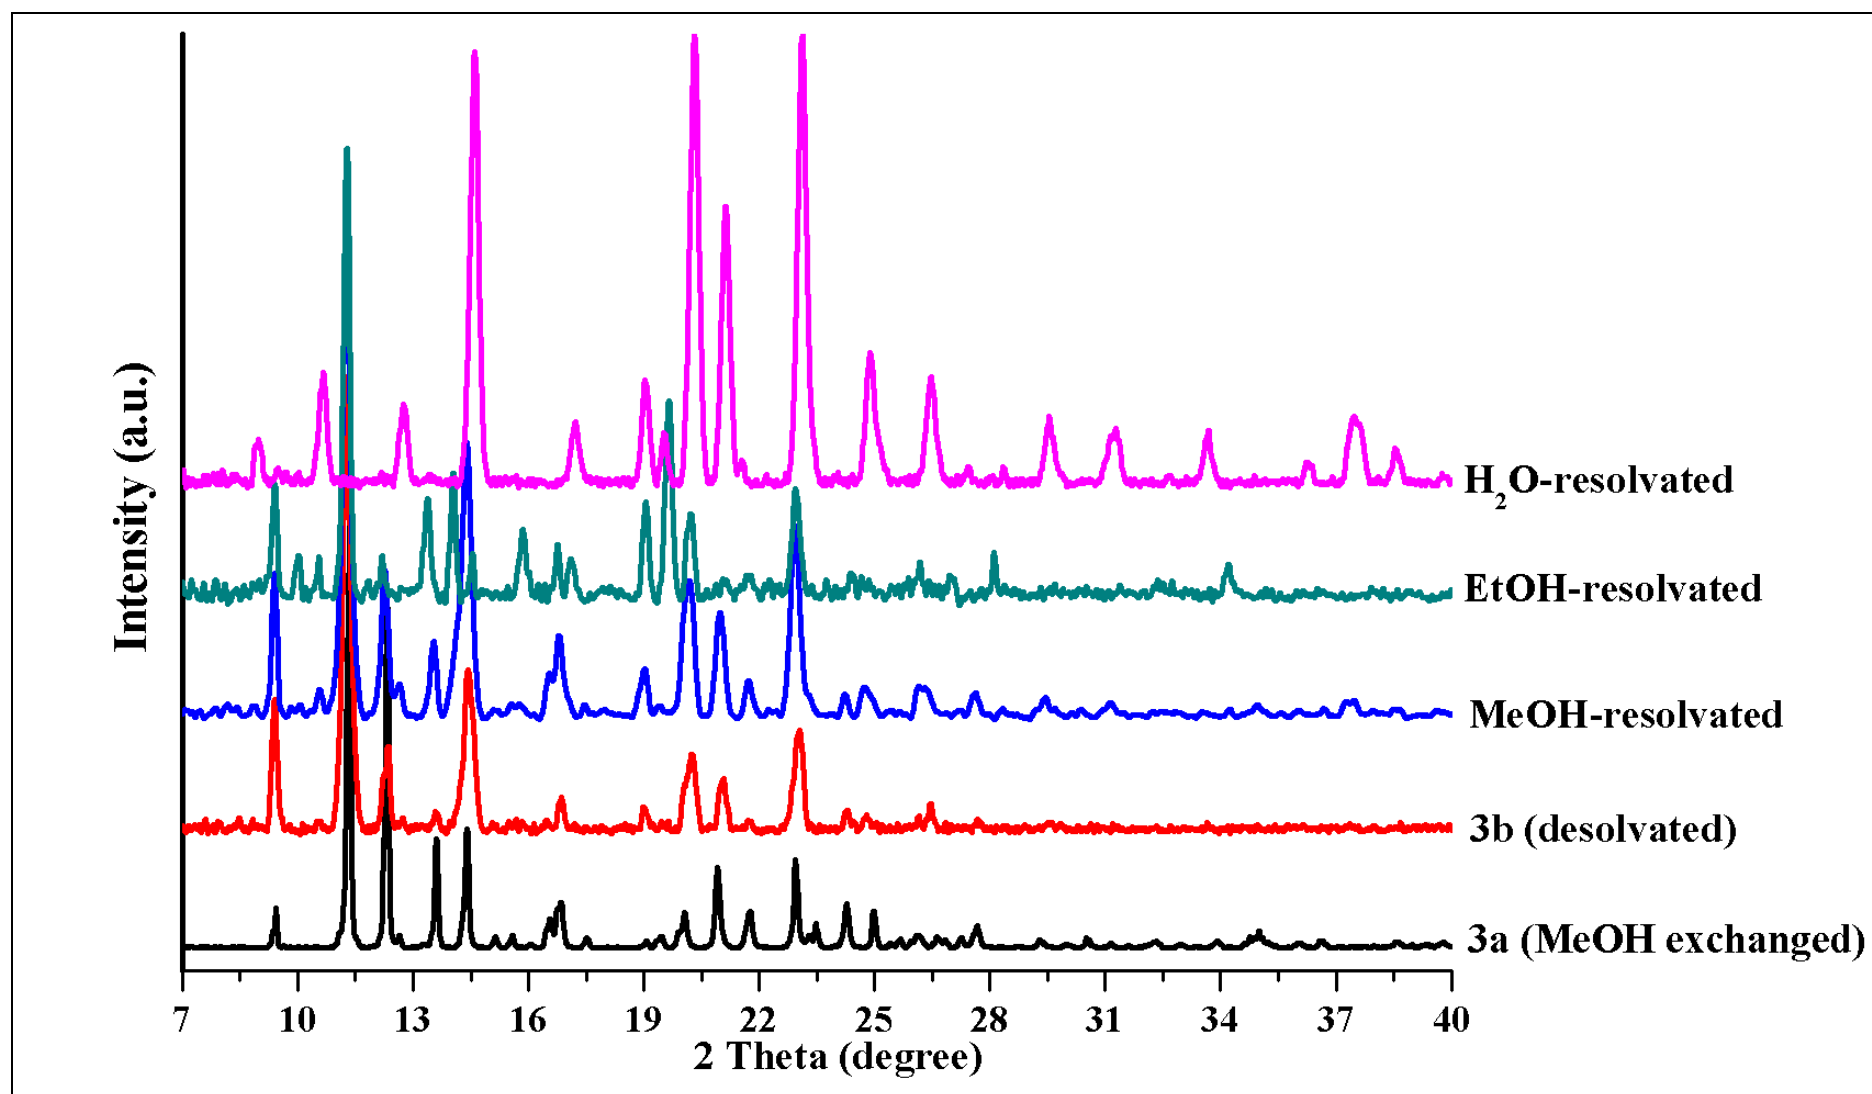

**Figure S9:** Comparative PXRD patterns for methanol exchanged (3a), de-solvated (3b) and various re-solvated samples

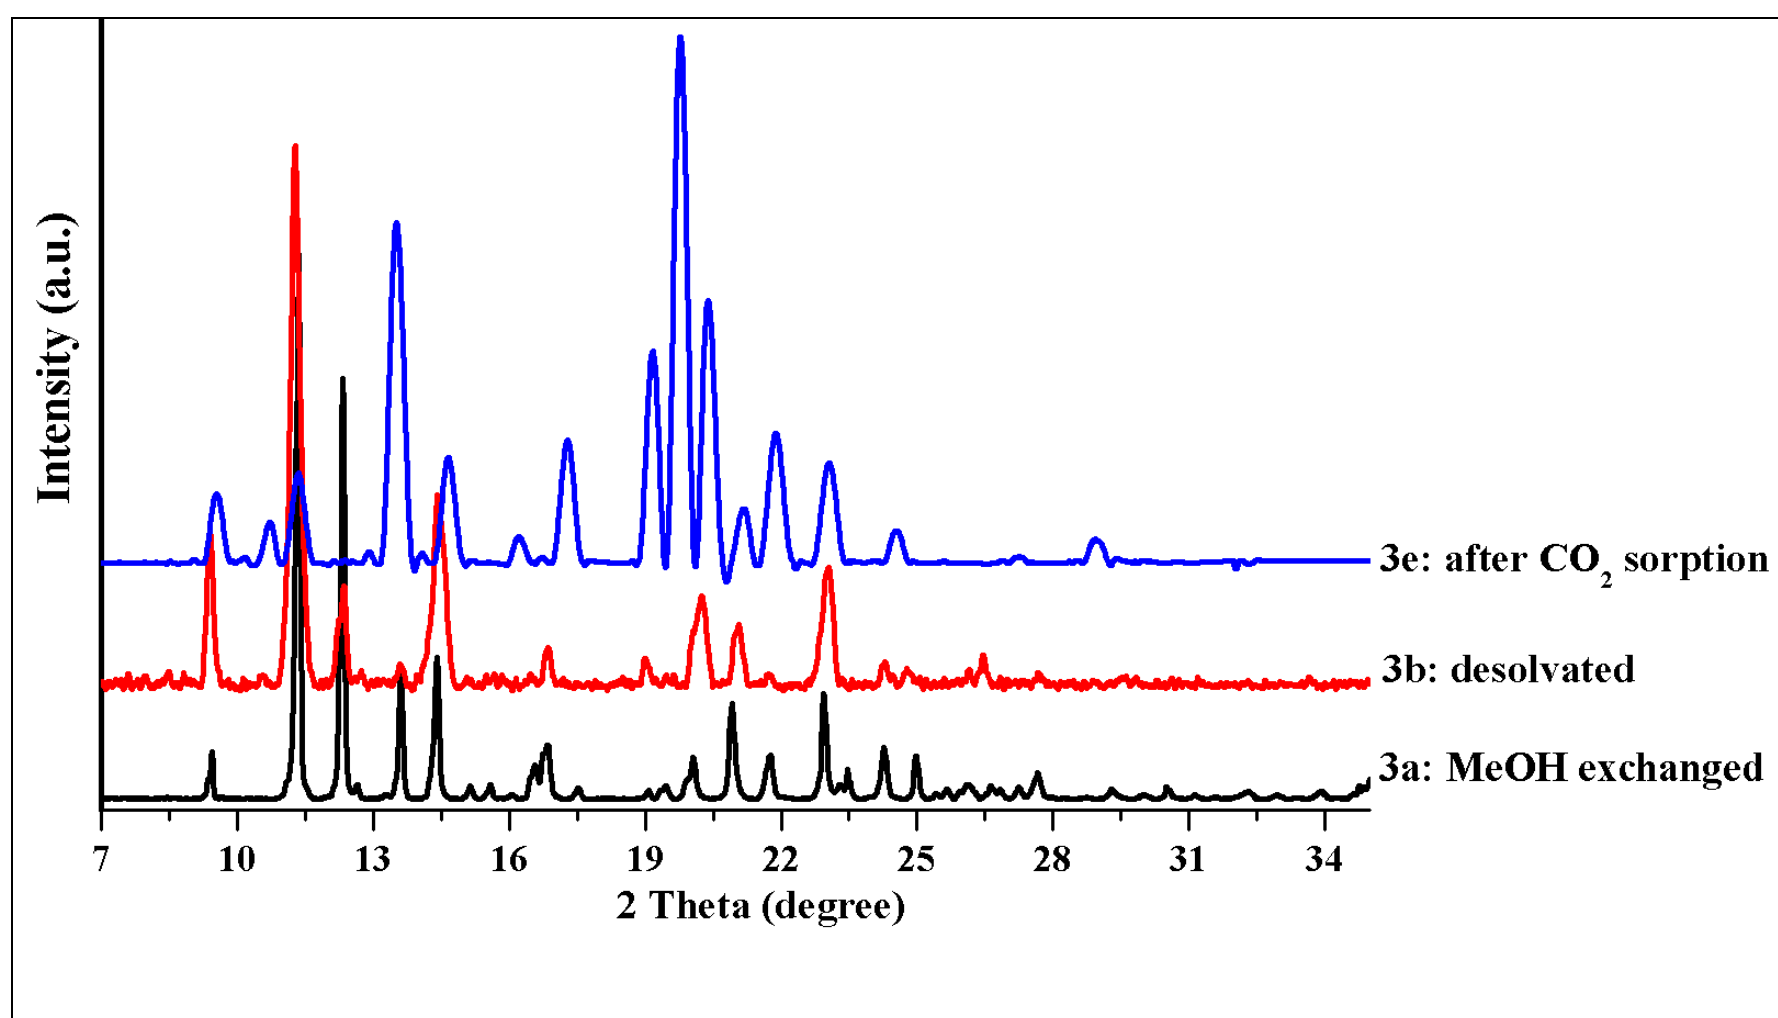

**Figure S10:** Comparative PXRD patterns for methanol exchanged (3a), de-solvated (3b) and after CO<sub>2</sub> sorption (3e)

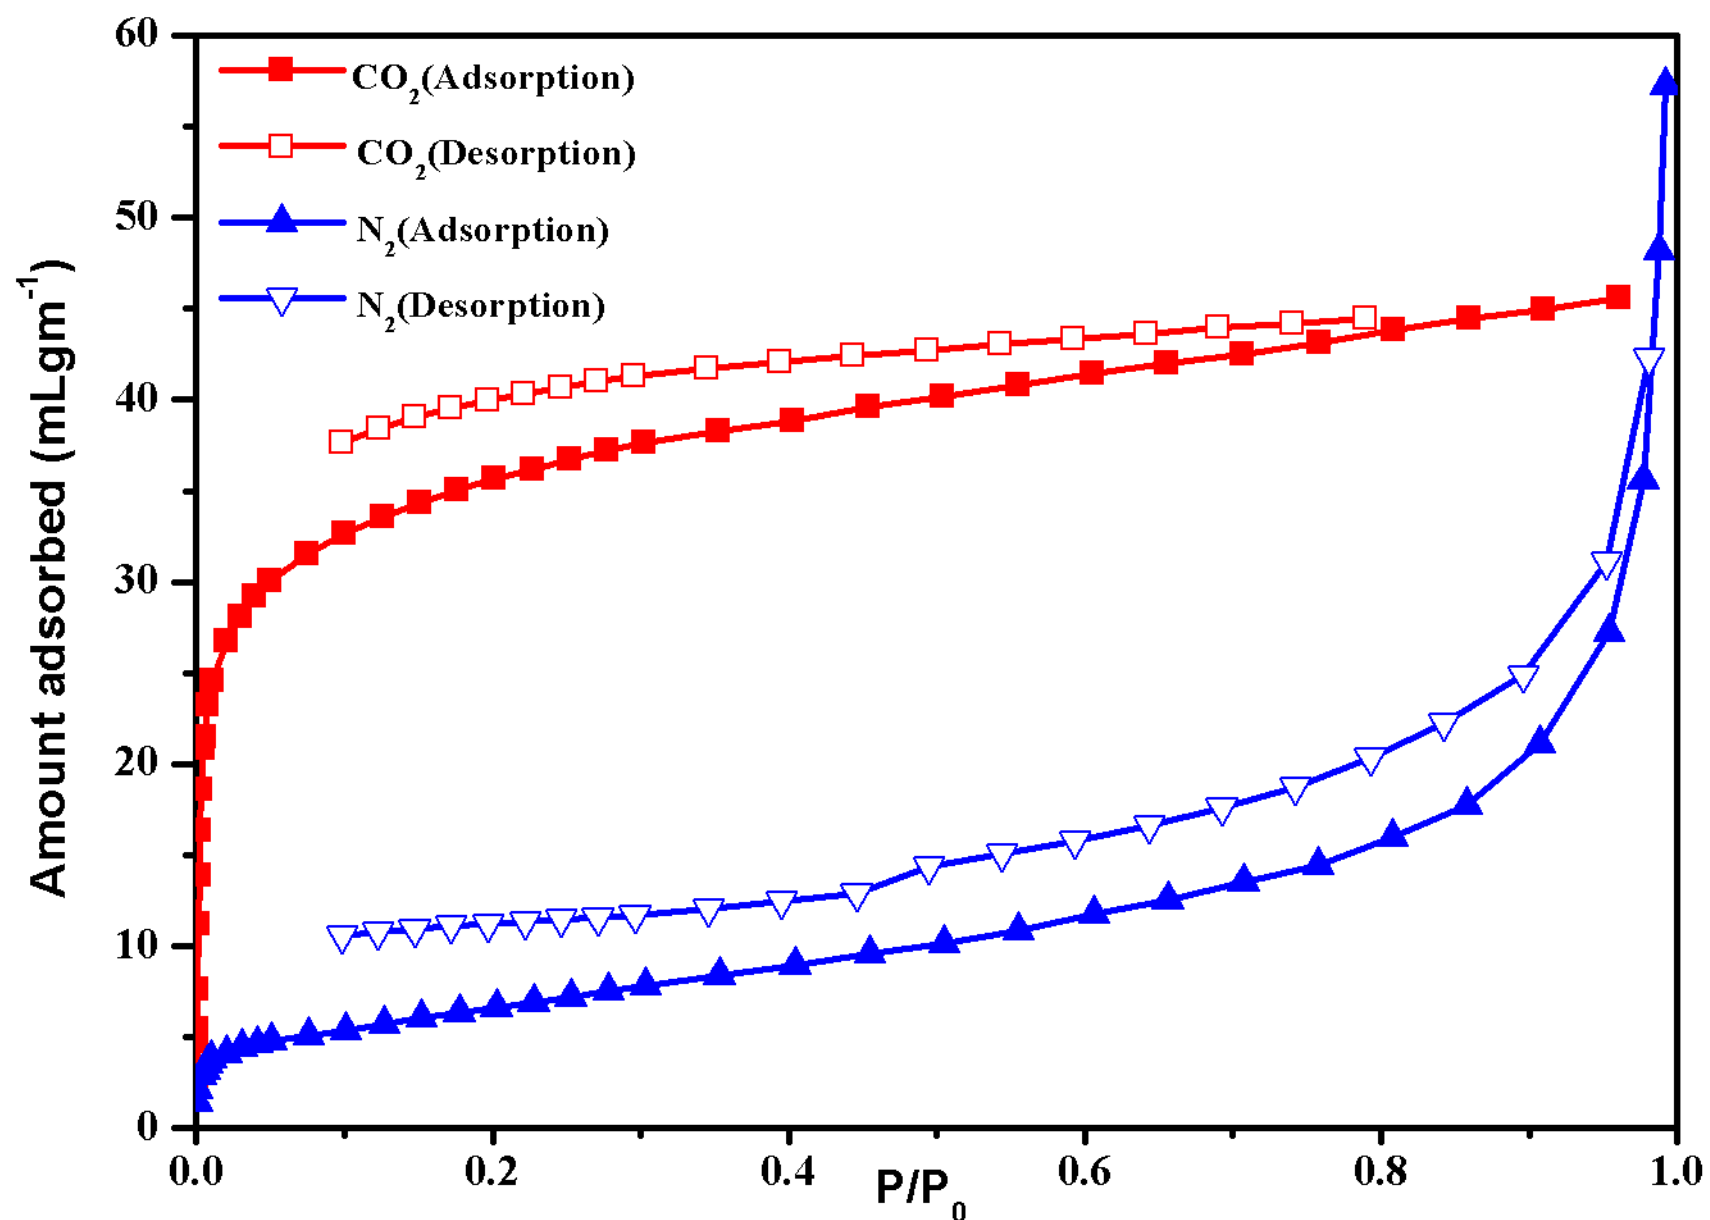

Figure S11: CO<sub>2</sub> and N<sub>2</sub> adsorption and desorption isotherms of **3b** at 195K and 77K, respectively. The BET surface area is calculated to be 133.4 m<sup>2</sup>g<sup>-1</sup>

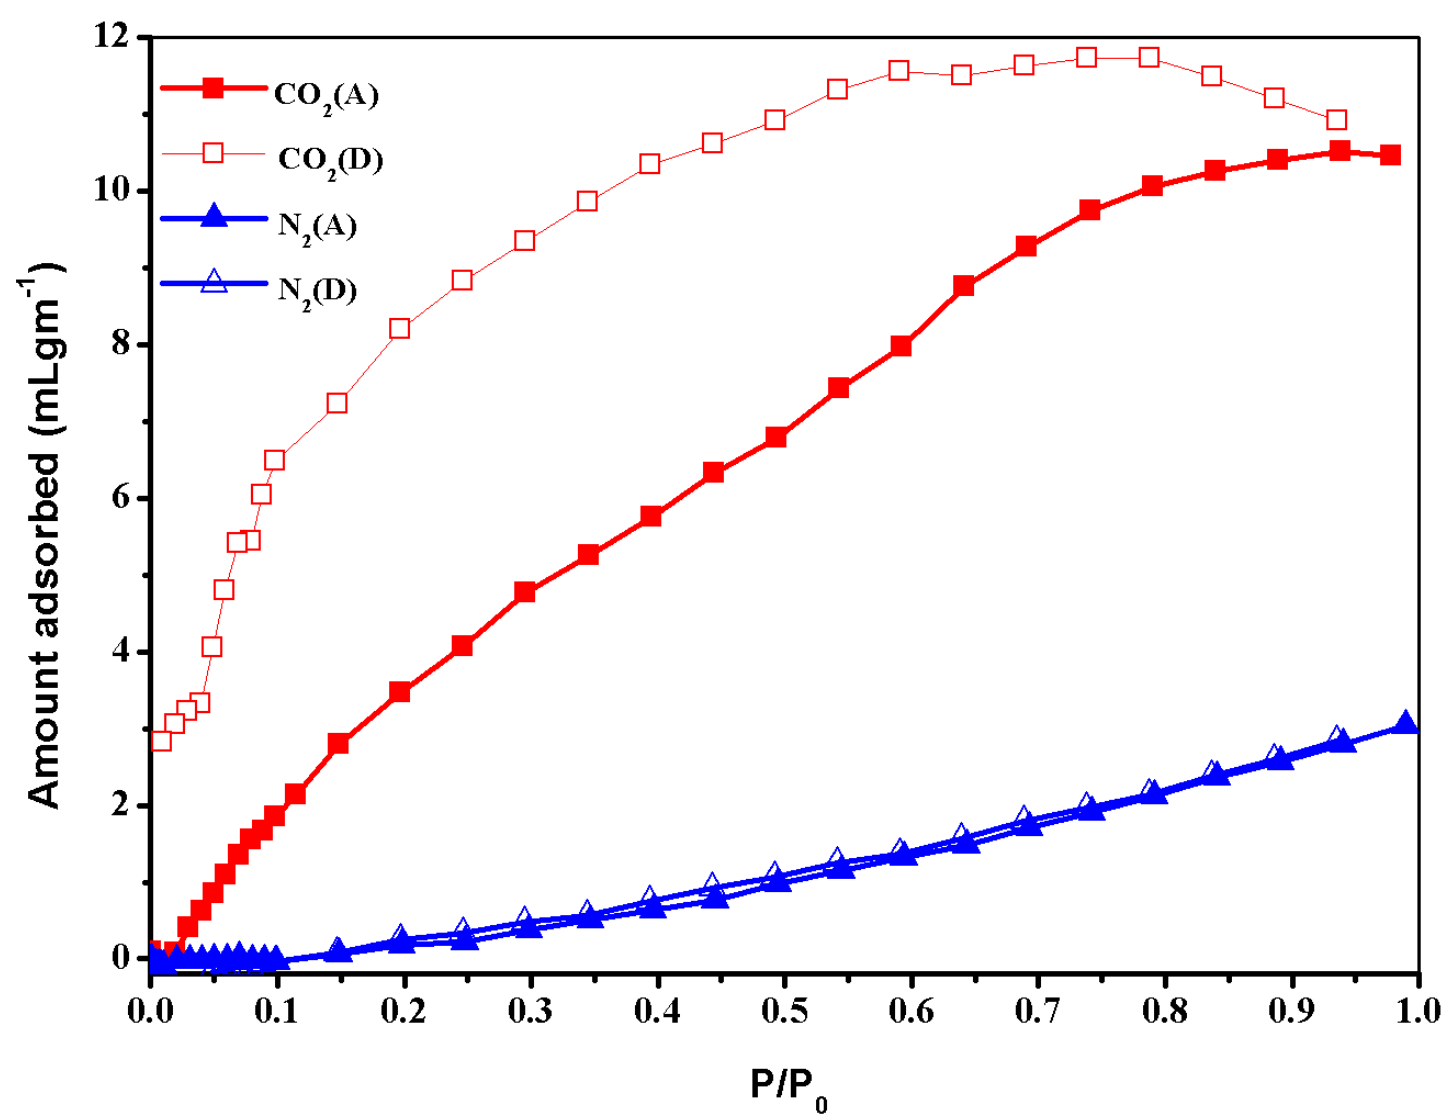

Figure S12: CO<sub>2</sub> and N<sub>2</sub> adsorption and desorption isotherms of **3b** at room temperature.

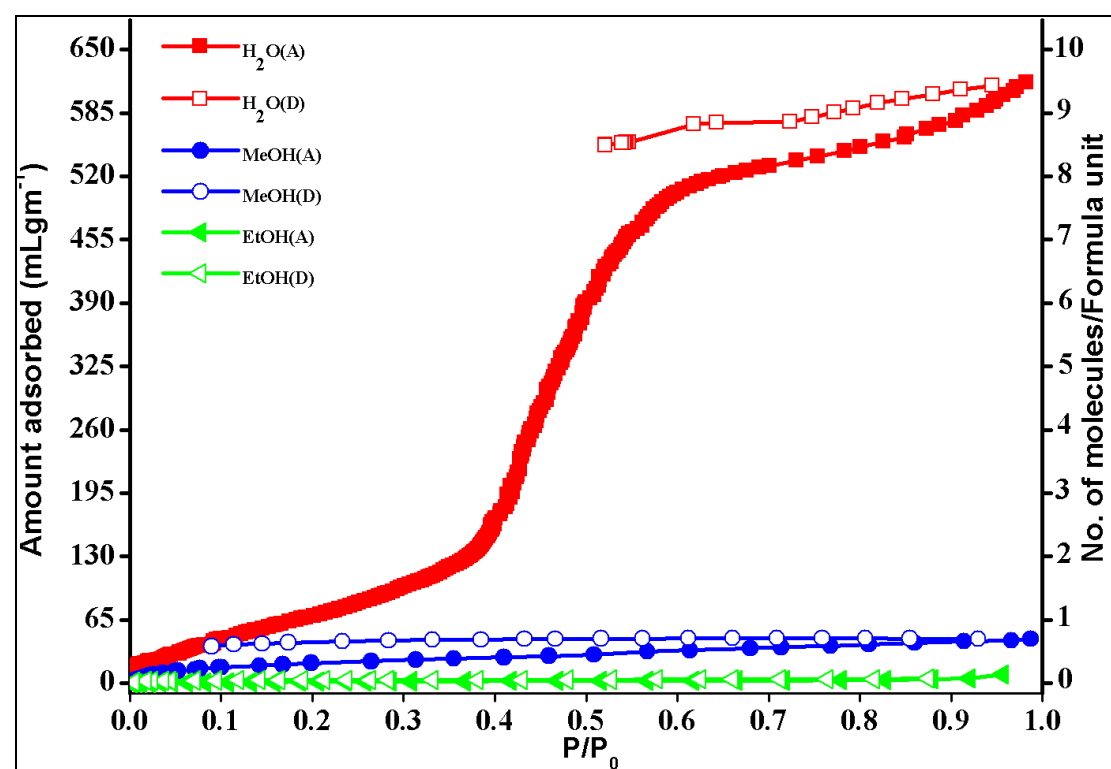

**Figure S13:** Solvent adsorption and desorption isotherms for **3b** at 298K

Number of solvent molecules per formula (N) unit has been calculated by

$$N = \frac{\text{Volume adsorbed (V) X Formula weight of the de-solvated sample (F)}}{\text{Molar volume of 1 mol. of a gas at STP (M)}}$$

M = 22.4 litre or 22400 mL for the gases at STP

F = 360.59 g/mol

From the graph, V = 615.91 ml/g for water, V = 45.63 for methanol and V= 8.79 for ethanol

For water adsorption N(w) = 9.91

For methanol adsorption N(m) = 0.734

For ethanol adsorption N(e) = 0.141

**The ratio of N(w) / N(m) = 13.5**

**The ratio of N(w) / N(e) = 70.3**

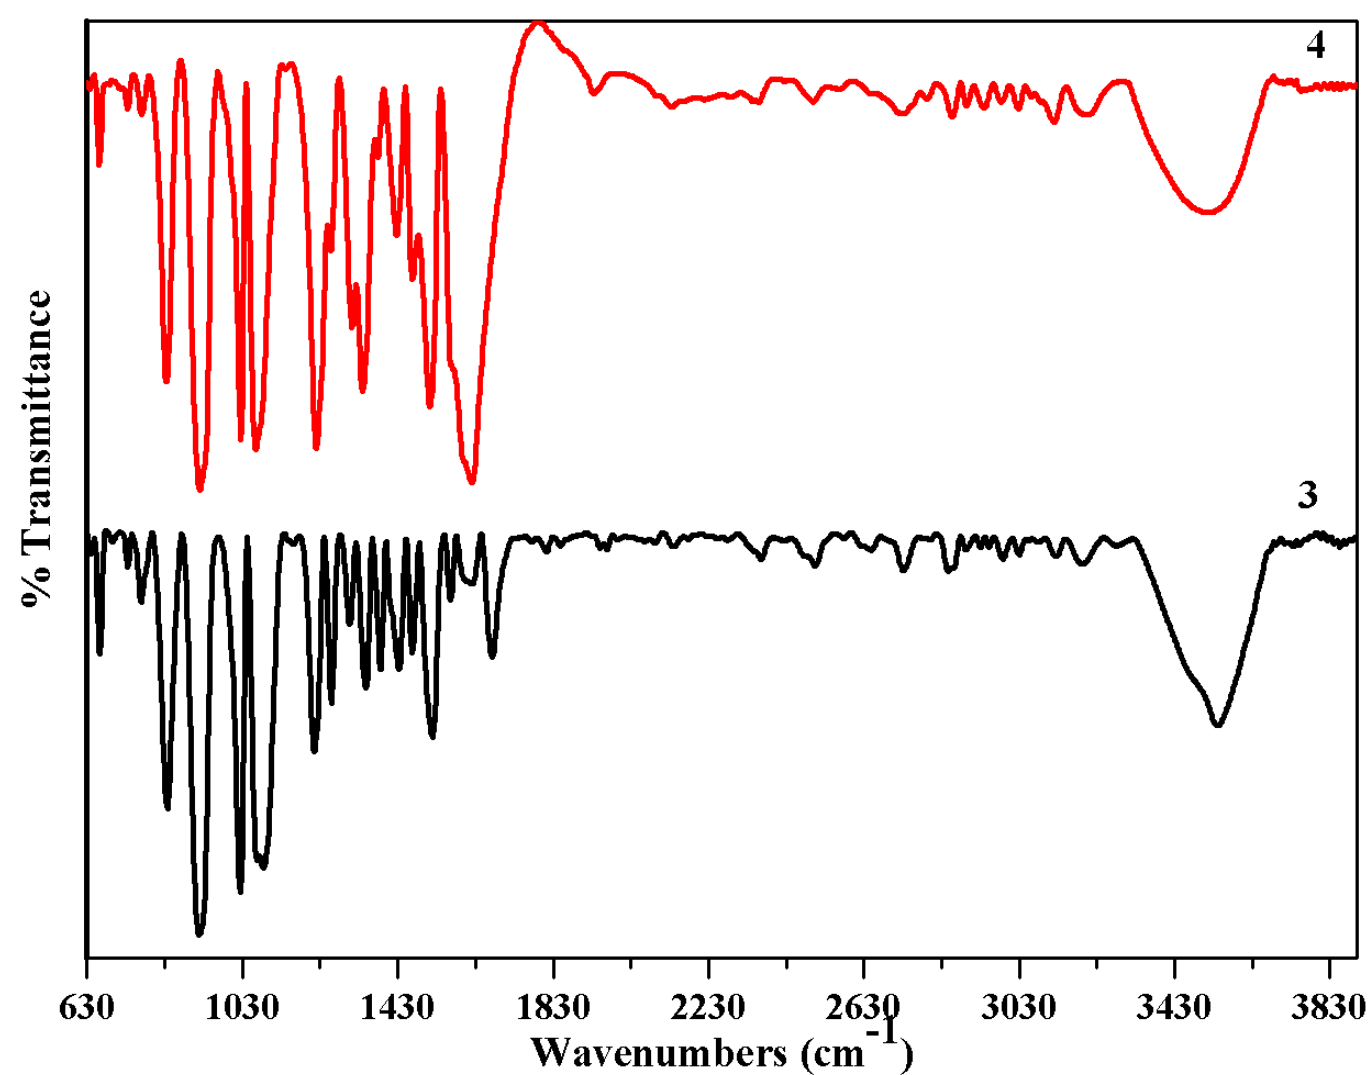

**Figure S14:** Infra Red spectra for **3** and **4**
